# Supplementary material
Source: publisher figshare collection journal article supplement (https://asha.figshare.com/articles/dataset/_/24463924)
Supplement: Supplementary file 1 [file 2]

**Supplemental Material S4.** Bonferroni corrected pairwise comparisons to assess mean differences in STI values. Mean differences are provided for each articulator. Statistics were performed on original STI values. Statistically significant differences are in bold.

| Articulator | Segment (%) | 25 | 50                             | 75                             | 100                            |
|-------------|-------------|----|--------------------------------|--------------------------------|--------------------------------|
| Tongue Tip  | 25          | -- | <b>2.04** [.96, 3.12]</b>      | -.17 [-1.54, 1.20]             | .20 [-1.26, 1.67]              |
|             | 50          |    | --                             | <b>-2.21*** [-2.93, -1.49]</b> | <b>-1.84*** [-2.66, -1.02]</b> |
|             | 75          |    |                                | --                             | 0.37 [-0.04, 0.79]             |
| Tongue Back | 25          | -- | -.28 [-1.45, 0.90]             | -1.40 [-2.84, 0.04]            | -1.11 [-2.56, 0.33]            |
|             | 50          |    | --                             | <b>-1.12 [-1.81, -0.44]</b>    | -0.84 [-1.58, -0.10]           |
|             | 75          |    |                                | --                             | 0.28 [-0.20, 0.77]             |
| Lower Lip   | 25          | -- | <b>-2.46*** [-3.35, -1.58]</b> | <b>-3.42*** [-4.53, -2.30]</b> | <b>-3.92*** [-5.26, -2.59]</b> |
|             | 50          |    | --                             | <b>-.95* [-1.61, -0.29]</b>    | <b>-1.46* [-2.38, -0.54]</b>   |
|             | 75          |    |                                | --                             | -0.51 [-1.03, 0.01]            |

Note. \* $p < .05$ ; \*\* $p < .01$ ; \*\*\* $p < .001$ .
