# Supplementary material
Source: publisher figshare collection journal article supplement (https://asha.figshare.com/articles/dataset/_/24463924)
Supplement: Supplementary file 2 [file 2]

**Supplemental Material S3.** Main and interaction effects of segment length (25%, 50%, 75%, 100% of an 8-syllable phrase) and group (control, Mild ALS, Severe ALS) from two-way mixed ANOVA for all articulators. Statistics were performed on original STI values. Statistically significant effects are in bold.

| Articulator | Effect                 | <i>F</i> statistic | <i>p</i> value   | partial $\eta^2$ |
|-------------|------------------------|--------------------|------------------|------------------|
| Tongue Tip  | <b>Segment length</b>  | <b>7.38</b>        | <b>.003</b>      | <b>.102</b>      |
|             | Group                  | 1.57               | .215             | .046             |
|             | Group × Segment length | 0.94               | .421             | .028             |
| Tongue Back | Segment length         | 2.28               | .121             | .034             |
|             | Group                  | 2.94               | .060             | .083             |
|             | Group × Segment length | 0.59               | .626             | .018             |
| Lower Lip   | <b>Segment length</b>  | <b>24.78</b>       | <b>&lt; .001</b> | <b>.276</b>      |
|             | Group                  | 0.44               | .645             | .013             |
|             | Group × Segment length | 0.13               | .954             | .004             |
