# Supplementary material
Source: publisher figshare collection journal article supplement (https://asha.figshare.com/articles/dataset/_/24463924)
Supplement: Supplementary file 3 [file 2]

**Supplemental Material S2.** Bonferroni corrected pairwise comparisons to assess mean differences in STI with 95% confidence intervals. Statistics were performed on original data. Statistically significant differences are in bold.

| Articulator | Syllables | 2  | 3                    | 5                              | 8                              |
|-------------|-----------|----|----------------------|--------------------------------|--------------------------------|
| Tongue Tip  | 2         | -- | -3.41 [-6.00, -0.81] | 1.38 [-0.91, 3.67]             | <b>-2.64* [-4.30, -0.98]</b>   |
|             | 3         |    | --                   | <b>4.79** [2.29, 7.28]</b>     | 0.77 [-1.67, 3.20]             |
|             | 5         |    |                      | --                             | <b>-4.02*** [-5.97, -2.07]</b> |
| Tongue Back | 2         | -- | -2.74 [-5.24, -0.24] | <b>-3.57** [-5.59, -1.56]</b>  | <b>-5.93*** [-7.63, -4.23]</b> |
|             | 3         |    | --                   | -0.83 [-3.28, 1.61]            | <b>-3.19* [-5.45, -0.93]</b>   |
|             | 5         |    |                      | --                             | <b>-2.36* [-4.05, -0.66]</b>   |
| Lower Lip   | 2         | -- | 0.94 [-1.55, 3.43]   | <b>-3.58** [-5.57, -1.60]</b>  | <b>-5.23*** [-7.18, -3.28]</b> |
|             | 3         |    | --                   | <b>-4.52*** [-6.59, -2.46]</b> | <b>-6.17*** [-8.27, -4.07]</b> |
|             | 5         |    |                      | --                             | -1.65 [-3.60, 0.30]            |

Note. \* $p < .05$ ; \*\* $p < .01$ ; \*\*\* $p < .001$ .
