# Supplementary material
Source: publisher figshare collection journal article supplement (https://asha.figshare.com/articles/dataset/_/24463924)
Supplement: Supplementary file 4 [file 2]

**Supplemental Material S1.** Main and interaction effects of length (2-, 3-, 5-, 8-syllables) and group (control, mild ALS, severe ALS) from two-way mixed ANOVA for all articulators. Statistics were performed on original data. Statistically significant effects are in bold.

| Articulator | Effect                  | <i>F</i> statistic | <i>p</i> value   | partial $\eta^2$ |
|-------------|-------------------------|--------------------|------------------|------------------|
| Tongue Tip  | <b>Syllable length</b>  | <b>4.06</b>        | <b>.022</b>      | <b>.111</b>      |
|             | <b>Group</b>            | <b>6.39</b>        | <b>&lt; .001</b> | <b>.090</b>      |
|             | Group × Syllable length | 1.03               | .404             | .031             |
| Tongue Back | <b>Syllable length</b>  | <b>10.57</b>       | <b>&lt; .001</b> | <b>.140</b>      |
|             | <b>Group</b>            | <b>5.19</b>        | <b>.008</b>      | <b>.138</b>      |
|             | Group × Syllable length | 0.71               | .619             | .021             |
| Lower Lip   | <b>Syllable length</b>  | <b>14.71</b>       | <b>&lt; .001</b> | <b>.185</b>      |
|             | <b>Group</b>            | <b>5.08</b>        | <b>.009</b>      | <b>.135</b>      |
|             | Group × Syllable length | 1.30               | .260             | .038             |
